# Supplementary material for: Parabrachial Calca neurons mediate second-order conditioning
Source: Springer Nature journal article supplement (doi:10.1038/s41467-024-53977-w), 2024-11-09
Supplement: MOESM1 [file 41467_2024_53977_MOESM1_ESM.pdf]

# Supplementary Information

## Supplementary Figures

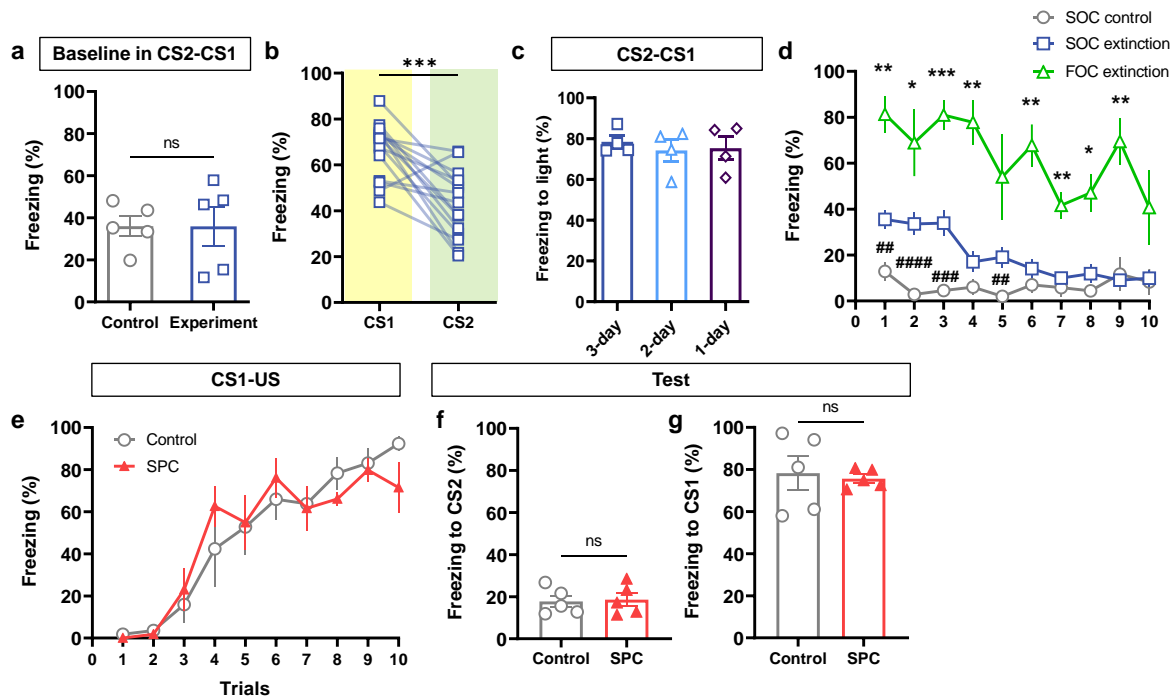

**Supplementary Figure 1: Extinction of SOC and sensory preconditioning in mice.**

**a**, Freezing during baseline (1-min before session start) in CS2-CS1 association ( $n = 5$  for each group). **b**, Comparison freezing to light CS1 during CS2-CS1 phase and freezing to tone CS2 during test phase ( $n = 15$  for experimental animals in Fig. 1). **c**, Freezing response to light CS1 during CS2-CS1 pairing in different training protocol ( $n = 4$  for each group). **d**, Freezing level during extinction trials of first-order conditioning (FOC extinction,  $n = 4$ ), second-order conditioning (SOC extinction,  $n = 15$ ), and control (SOC control,  $n = 9$ ). Asterisks (\*) indicate comparison between FOC extinction and SOC extinction. Pound signs (#) indicate comparison between SOC extinction and control. **e**, Learning curves during CS1-US association of sensory preconditioning. SPC, sensory preconditioning. **e**, Freezing responses to the tone CS2 on test phase of sensory preconditioning protocol. **f**, Freezing responses to the light CS1 during test phase. **e-g**,  $n = 5$  for each group. Data are mean  $\pm$  SEM, \* $p < 0.05$ , \*\* $p < 0.01$ , \*\*\* $p < 0.001$ , ## $p < 0.01$ , ### $p < 0.001$ , #### $p < 0.0001$ . Source data are provided as a Source Data file.

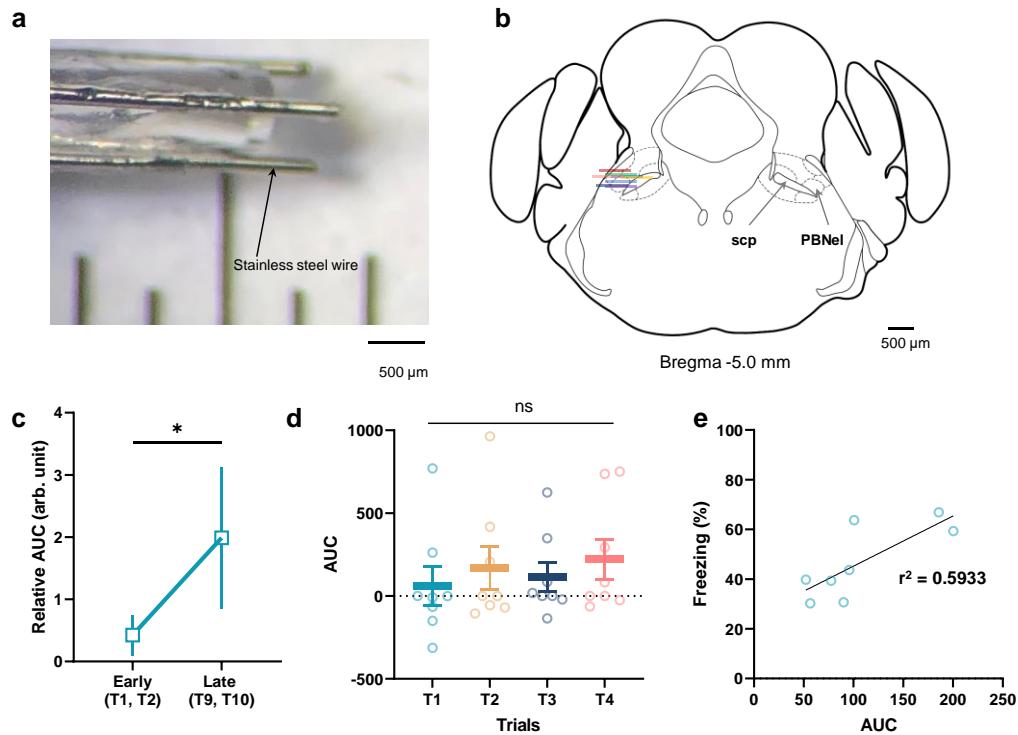

**Supplementary Figure 2: GRIN lens implantation in PBN and AUC analysis based on trials.**

**a**, Picture of prong wires attached to GRIN lens for minimizing motion artifact. **b**, Schematic depiction of GRIN lens placements over PBN. Note that PBN section is adapted from Franklin and Paxinos mouse brain atlas<sup>1</sup>. **c**, AUC of CGRP<sup>PBN</sup> neurons during CS1 across early and late trials during CS1-US association (103 neurons). **d**, AUC of CGRP<sup>PBN</sup> neurons during tone CS2 across the trials in CS2-CS1 association ( $n = 8$ ). **e**, Linear regression between AUC during tone CS2 in test day and freezing behavior ( $n = 8$ ). The equation of line graph is as  $Y = 0.2018X + 25.04$ . The data indicate individual animals; plotted as mean  $\pm$  SEM. Source data are provided as a Source Data file.

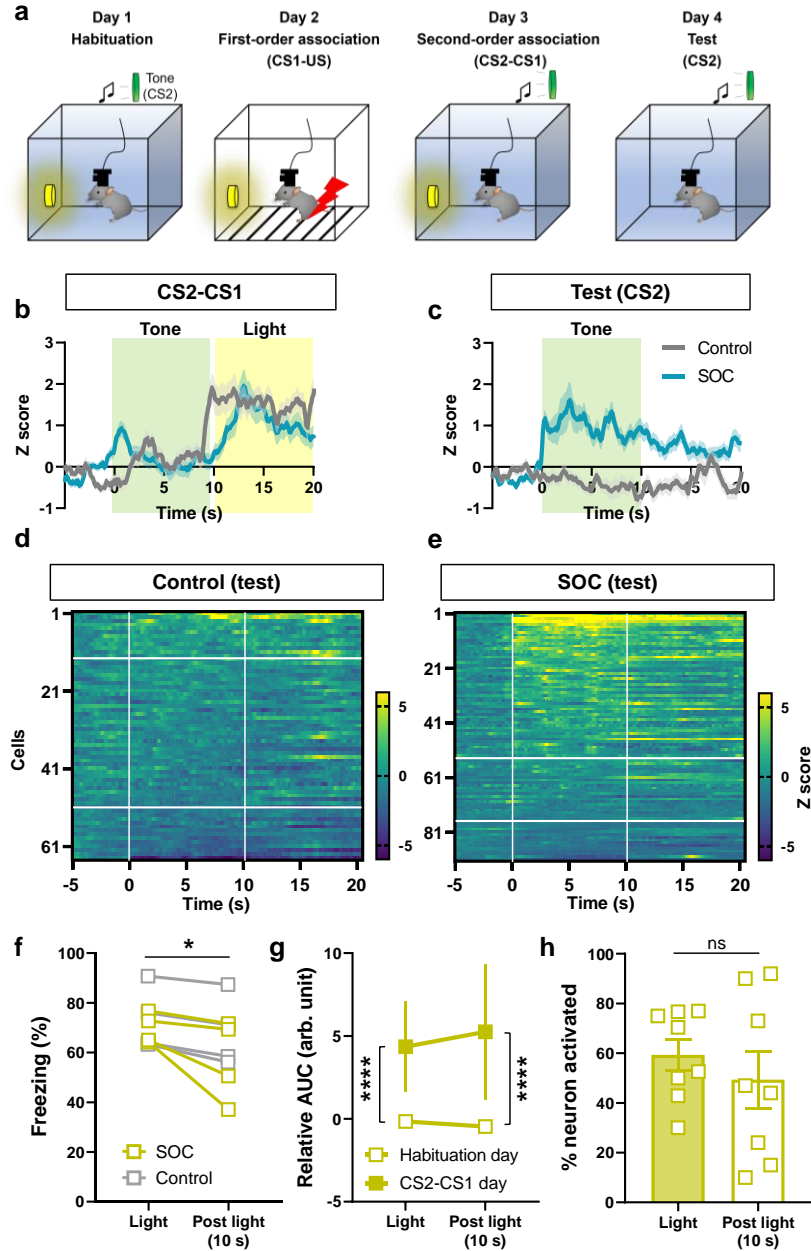

**Supplementary Figure 3: CGRP<sup>PBN</sup> neuronal activity during SOC in the protocol designed to minimize contextual contribution.**

**a**, Schematic of the experimental paradigm of SOC minimizing contextual contribution. **b**, Average traces of CGRP<sup>PBN</sup> neurons in the control and the SOC group in response to tone CS2 and light CS1 during the CS2-CS1 association and **c**, test days. **d**, Heat map showing individual neuronal responses of the control group to tone CS2 on the test day. **e**, Heat map showing individual neuronal responses of the experimental group to tone CS2 on the test day. **b-e**,  $n = 64$  from 4 animals for control group and  $n = 91$  neurons from 4 animals for SOC group. **f**, Percent of time freezing during light CS1 on the CS2-CS1 association day ( $n = 8$ ). **g**, AUC during light CS1 and post-light (10 s), compared to the pre 10 s of baseline. Open dots indicate responses of the CGRP<sup>PBN</sup> neurons to the light CS1 during habituation day

40 (108 neurons). Closed dots indicate responses of the CGRP<sup>PBN</sup> neurons to the light CS1 during CS2-  
41 CS1 association day (155 neurons) **h**, Percentage of increased responses of CGRP<sup>PBN</sup> neurons during  
42 light CS1 and post-light ( $n = 8$ ). Dots represent individual animals. The data are plotted as mean  $\pm$  SEM.  
43 \* $p < 0.05$ . Source data are provided as a Source Data file.

44

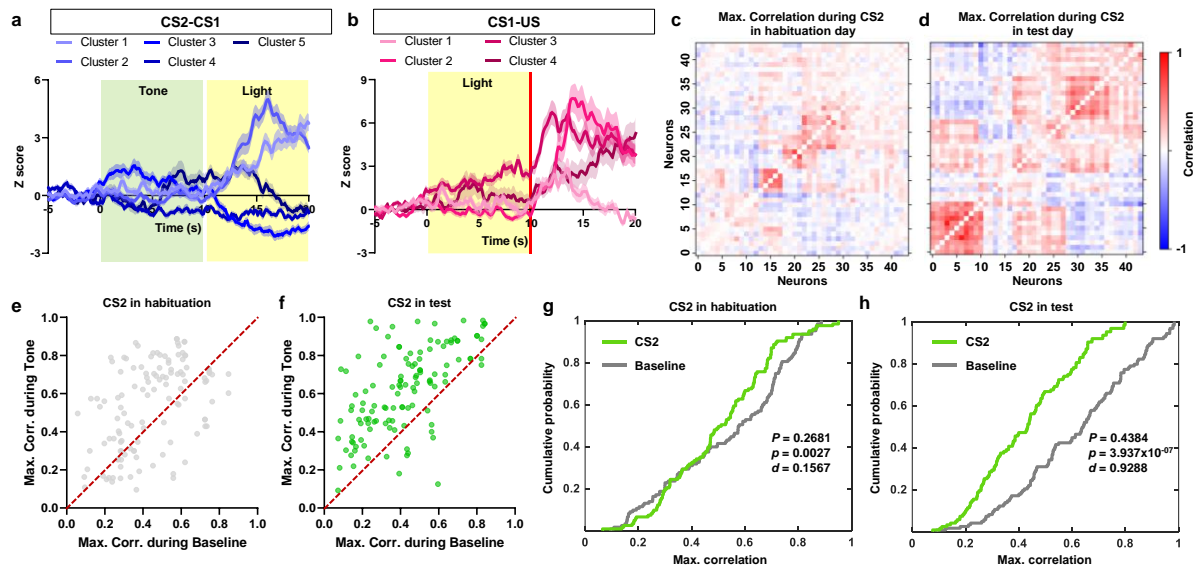

**Supplementary Figure 4: Cluster and correlation analysis of CGRP<sup>PBN</sup> neurons during SOC.**

**a**, Clustered activities of CGRP<sup>PBN</sup> neurons during CS2-CS1 association (197 neurons). **b**, Clustered activities of CGRP<sup>PBN</sup> neurons during CS1-US association (103 neurons). **c**, Heatmap of maximum correlations within CGRP<sup>PBN</sup> neurons from representative animal before SOC (habituation). **d**, Heatmap of maximum correlations within CGRP<sup>PBN</sup> neurons from representative animal after SOC (test). **e**, Linear regression of maximum correlations of CGRP<sup>PBN</sup> neurons in habituation phase. **f**, Linear regression of maximum correlations of CGRP<sup>PBN</sup> neurons in test day. **g**, Cumulative distribution function of maximum correlations during tone CS2 and baseline in habituation day. Note that baseline indicates neural activities of first 5 min in test chamber before session start. P indicates pairwise Pearson's correlation. *p* indicates paired t-test. *d* indicates Cohen's *d* which represents effect size. **h**, Cumulative distribution function of mean correlations during tone CS2 and baseline in test day. **e-h**, *n* = 122 neurons. Data are mean ± SEM. Dots indicate individual neurons. Source data are provided as a Source Data file.

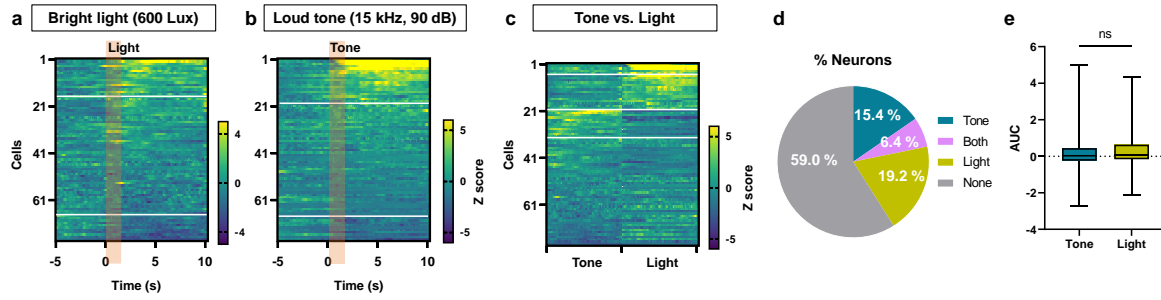

**Supplementary Figure 5: CGRP<sup>PBN</sup> neuronal responses to the noxious light and tone before learning.**

**a**, Heat map showing individual CGRP<sup>PBN</sup> neuron responses to bright light (1 s, 600 lux) and **b**, loud tone (1 s, 15 kHz, 90 dB). Neurons are aligned based on activity between 0 and 10 s. The top neurons (above the first white line) show increased activity, the middle neurons are non-responsive, and the bottom neurons (below the second white line) show decreased activity. **c**, Comparison of responses between the loud tone and bright light based on activity patterns. From top to bottom: neurons activated by both stimuli, neurons activated only by bright light, neurons activated only by loud tone, and neurons non-responsive to both stimuli. **d**, Proportion of CGRP<sup>PBN</sup> neurons based on their responses. **e**, Average AUC of neurons 10 s after the onset of the loud tone or bright light. **a-e**,  $n = 78$  neurons from 4 animals. The boxes indicate first and third quartile; line in the box plot indicate median; whiskers indicate 5-95 percentile of population. Source data are provided as a Source Data file.

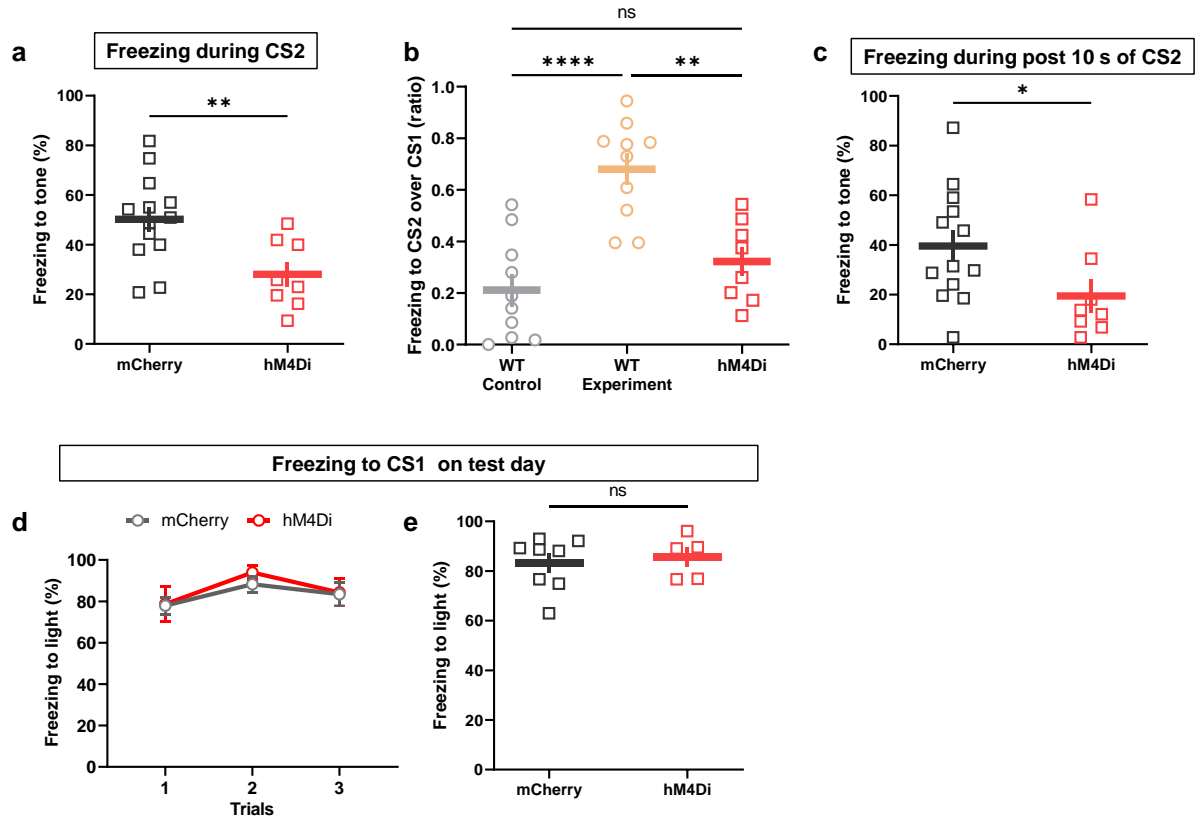

**Supplementary Figure 6: Transient inhibition of  $\text{CGRP}^{\text{PBN}}$  neurons during second-order association attenuates freezing to CS2 and post CS2.** **a**, Freezing responses to tone CS2 of control ( $n = 13$ ) and hM4Di ( $n = 8$ ) groups after SOC. **b**, Comparison of freezing ratio CS2 over CS1 between WT mice ( $n = 10$ ) experiments ( $n = 10$ ) and hM4Di ( $n = 8$ ) group. Note that WT control did not receive second-order association. **c**, Freezing responses to post CS2 (10 sec after CS2) of control ( $n = 13$ ) and hM4Di ( $n = 8$ ) groups in test phase. **d**, Freezing responses to CS1 of control ( $n = 8$ ) and hM4Di ( $n = 5$ ) groups in test phase based on trials. **e**, Average of trials in **d**. Data are plotted as mean  $\pm$  SEM, \* $p < 0.05$ , \*\* $p < 0.01$ , \*\*\*\* $p < 0.0001$ . Source data are provided as a Source Data file.

| Figure            | Mean<br>(number of data)                                                                                                            | Normality test<br>(Shapiro-Wilk test,<br>$P > 0.05$ ; passed)                                                                            | Statistical test                                              | Comparison                        | Results (P<br>value) |
|-------------------|-------------------------------------------------------------------------------------------------------------------------------------|------------------------------------------------------------------------------------------------------------------------------------------|---------------------------------------------------------------|-----------------------------------|----------------------|
| Fig. 1c           | Experiment CS1 = 72.71 (5)<br>Experiment CS2 = 53.23 (5)<br>Control CS1 = 77.77 (5)                                                 | Experiment CS1, $P = 0.3296$<br>Experiment CS2, $P = 0.3635$<br>Control CS1, $P = 0.2670$                                                | Two-way RM ANOVA<br>$F(1, 8) = 86.61$                         | Experiment CS1 vs. Experiment CS2 | $< 0.0001$           |
|                   |                                                                                                                                     |                                                                                                                                          | Two-way ANOVA<br>$F(1, 8) = 43.17$                            | Control CS1 vs. Experiment CS2    | 0.0002               |
| Fig. 1d           | Control = 7.143 (14)<br>Experiment = 42.81 (15)                                                                                     | $P = 0.0795$ for Control<br>$P = 0.6454$ for Experiment                                                                                  | Unpaired t-test (Two-tailed)<br>$t = 8.381$ , $df = 27$       | Control vs. Experiment            | $< 0.0001$           |
| Fig. 1e           | Median difference of Experiment = 19.72 (10)                                                                                        | 10 kHz, $P = 0.0200$<br>5 kHz, $P = 0.3954$                                                                                              | Wilcoxon signed rank test<br>$W = 10$                         | 10 kHz vs 5 kHz                   | 0.0020               |
| Fig. 1f           | Control = 17.82 (11)<br>Experiment = 48.45 (11)<br>30-s interval = 11.84 (12)<br>Reversed = 16.60 (13)<br>Simultaneous = 14.36 (10) | Control, $P = 0.0229$<br>Experiment, $P = 0.0239$<br>30-s interval, $P = 0.0577$<br>Reversed, $P = 0.1172$<br>Simultaneous, $P = 0.3331$ | Kruskal-Wallis test<br>$K = 21.06$<br>$P = 0.0003$            | Experiment vs. Control            | $< 0.0001$           |
|                   |                                                                                                                                     |                                                                                                                                          |                                                               | Experiment vs. 30-s interval      | 0.0052               |
|                   |                                                                                                                                     |                                                                                                                                          |                                                               | Experiment vs. Reversed           | 0.0079               |
|                   |                                                                                                                                     |                                                                                                                                          |                                                               | Experiment vs. Simultaneous       | 0.0058               |
| Fig. 1g           | Control = 7.84 (5)<br>Experiment = 42.53 (5)<br>2-SOC = 45.58 (5)                                                                   | Control, $P = 0.5247$<br>Experiment, $P = 0.6563$<br>2-SOC, $P = 0.4133$                                                                 | One-way ANOVA<br>$F(2, 12) = 2.245$<br>$P = 0.0017$           | Control vs. Experiment            | 0.0052               |
|                   |                                                                                                                                     |                                                                                                                                          |                                                               | Control vs. 2-SOC                 | 0.0028               |
|                   |                                                                                                                                     |                                                                                                                                          |                                                               | Experiment vs. 2-SOC              | 0.9366               |
| Fig. 1i           | 3-day = 33.78 (9)<br>2-day = 7.852 (10)<br>1-day = 6.370 (10)<br>Control = 6.370 (5)                                                | 3-day, $P = 0.3057$<br>2-day, $P = 0.8658$<br>1-day, $P = 0.4034$<br>Control, $P = 0.2580$                                               | One-way ANOVA<br>$F = 19.85$<br>$P < 0.0001$                  | 3-day vs. 2-day                   | $< 0.0001$           |
|                   |                                                                                                                                     |                                                                                                                                          |                                                               | 3-day vs. 1-day                   | $< 0.0001$           |
|                   |                                                                                                                                     |                                                                                                                                          |                                                               | 3-day vs. Control                 | $< 0.0001$           |
| Fig. 2d           | Baseline = 23.76 (8)<br>Tone = 45.49 (8)<br>Post tone = 42.86 (8)                                                                   | Baseline, $P = 0.1290$<br>Tone, $P = 0.6057$<br>Post tone, $P = 0.9724$                                                                  | One-way RM ANOVA<br>$F(1.810, 12.67) = 7.242$<br>$P = 0.0092$ | Baseline vs. Tone                 | 0.0464               |
|                   |                                                                                                                                     |                                                                                                                                          |                                                               | Baseline vs. Post tone            | 0.0663               |
|                   |                                                                                                                                     |                                                                                                                                          |                                                               | Tone vs Post tone                 | 0.9473               |
| Fig. 3a<br>(left) | Habituation = 13.81 (199)<br>CS1-US = 74.59 (103)<br>CS2-CS1 = 74.59 (197)                                                          | Habituation, $P < 0.0001$<br>CS1-US, $P = 0.0016$<br>CS2-CS1, $P < 0.0001$                                                               | Kruskal-Wallis test<br>$K = 15.15$<br>$P = 0.0005$            | Habituation vs. CS1-US            | 0.0009               |
|                   |                                                                                                                                     |                                                                                                                                          |                                                               | Habituation vs. CS2-CS1           | 0.0154               |
|                   |                                                                                                                                     |                                                                                                                                          |                                                               | CS1-US vs. CS2-CS1                | 0.9971               |



|                              |                                                                                                                   |                                                                                                                    |                                                               |                                           |            |
|------------------------------|-------------------------------------------------------------------------------------------------------------------|--------------------------------------------------------------------------------------------------------------------|---------------------------------------------------------------|-------------------------------------------|------------|
| <b>Fig. 3a (right)</b>       | Habituation = -3.068 (199)<br>CS2-CS1 = 13.17 (197)<br>Test = 110.2 (209)                                         | Habituation, $P < 0.0001$<br>CS1-CS2, $P = 0.0045$<br>Test, $P < 0.0001$                                           | Kruskal-Wallis test<br>$K = 74.23$<br>$P < 0.0001$            | Habituation vs. CS2-CS1                   | 0.2775     |
|                              |                                                                                                                   |                                                                                                                    |                                                               | Habituation vs. Test                      | $< 0.0001$ |
|                              |                                                                                                                   |                                                                                                                    |                                                               | CS2-CS1 vs. Test                          | $< 0.0001$ |
| <b>Fig. 3e</b>               | Habituation = 155.5 (18)<br>CS2-CS1 = 25.39 (18)<br>Test = 81.08 (18)                                             | Habituation, $P = 0.2309$<br>CS2-CS1, $P = 0.4220$<br>Test, $P = 0.1555$                                           | One-way RM ANOVA<br>$F(1.833, 31.15) = 12.15$<br>$P = 0.0002$ | Habituation vs. CS2-CS                    | 0.0013     |
|                              |                                                                                                                   |                                                                                                                    |                                                               | Habituation vs. Test                      | 0.0232     |
|                              |                                                                                                                   |                                                                                                                    |                                                               | CS2-CS1 vs. Test                          | 0.0749     |
| <b>Fig. 3f</b>               | Habituation = -2.388 (76)<br>CS2-CS1 = -4.382 (76)<br>Test = 55.77 (76)                                           | Habituation, $P = 0.0593$<br>CS2-CS1, $P = 0.0086$<br>Test, $P = 0.0734$                                           | Friedman test<br>$F = 19.13$<br>$P < 0.0001$                  | Habituation vs. CS2-CS1                   | $> 0.9999$ |
|                              |                                                                                                                   |                                                                                                                    |                                                               | Habituation vs. Test                      | 0.0011     |
|                              |                                                                                                                   |                                                                                                                    |                                                               | CS2-CS1 vs. Test                          | 0.0002     |
| <b>Fig. 3g</b>               | Habituation = -135.4 (28)<br>CS2-CS1 = 32.57 (28)<br>Test = 95.70 (28)                                            | Habituation, $P = 0.9992$<br>CS2-CS1, $P = 0.3078$<br>Test, $P = 0.0027$                                           | Friedman test<br>$F = 35.64$<br>$P < 0.0001$                  | Habituation vs. CS2-CS1                   | $< 0.0001$ |
|                              |                                                                                                                   |                                                                                                                    |                                                               | Habituation vs. Test                      | $< 0.0001$ |
|                              |                                                                                                                   |                                                                                                                    |                                                               | CS2-CS1 vs. Test                          | 0.4247     |
| <b>Fig. 3j</b>               | Mean difference = 309.9 in 1 <sup>st</sup> -order<br>-10.86 in 2 <sup>nd</sup> -order<br>CS1/CS2 (25)<br>CS2 (28) | CS1/CS2, $P = 0.0730$<br>CS2, $P = 0.4432$                                                                         | Two-way RM ANOVA<br>$F(1, 51) = 72.80$<br>$P < 0.0001$        | CS1/CS2 vs. CS2 in 1 <sup>st</sup> -order | $< 0.0001$ |
|                              |                                                                                                                   |                                                                                                                    |                                                               | CS1/CS2 vs. CS2 in 2 <sup>nd</sup> -order | 0.9087     |
| <b>Fig. 3i</b>               | Mean difference = -10.86 in 0-10 s<br>-90.49 in 10-20 s<br>CS1/CS2 (25)<br>CS2 (28)                               | CS1/CS2, $P = 0.2738$<br>CS2, $P < 0.0001$                                                                         | Two-way RM ANOVA<br>$F(1, 51) = 4.049$<br>$P = 0.0495$        | CS1/CS2 vs. CS2 in 0-10 s                 | 0.9451     |
|                              |                                                                                                                   |                                                                                                                    |                                                               | CS1/CS2 vs. CS2 10-20 s                   | 0.0286     |
| <b>Fig. 4c</b>               | mCherry light = 83.88 (13)<br>hM4Di light = 88.64 (8)<br>mCherry tone = 56.13 (13)<br>hM4Di tone = 54.02 (8)      | mCherry light, $P = 0.5215$<br>hM4Di light, $P = 0.7614$<br>mCherry tone, $P = 0.3436$<br>hM4Di tone, $P = 0.4700$ | Two-way ANOVA<br>$F(3, 57) = 1.757$<br>$P = 0.1656$           | mCherry light vs. hM4Di light             | 0.3958     |
|                              |                                                                                                                   |                                                                                                                    | Two-way ANOVA<br>$F(3, 57) = 0.2211$<br>$P = 0.8813$          | mCherry tone vs. hM4Di tone               | 0.68347    |
| <b>Fig. 4d</b>               | mCherry = 0.6133 (13)<br>hM4Di = 0.3221 (8)                                                                       | mCherry, $P = 0.5845$<br>hM4Di, $P = 0.6684$                                                                       | Unpaired t-test (Two-tailed)<br>$t = 3.038$ , $df = 19$       | mCherry vs. hM4Di                         | 0.0068     |
| <b>Supplementary Fig. 1a</b> | Control = 36.00 (5)<br>Experiment = 35.89 (5)                                                                     | Control, $P = 0.7714$<br>Experiment, $P = 0.2014$                                                                  | Unpaired t-test (Two-tailed)<br>$t = 0.0100$ , $df = 8$       | Control vs. Experiment                    | 0.9922     |
| <b>Supplementary Fig. 1c</b> | 3-day = 78.42<br>2-day = 74.19<br>1-day = 75.35                                                                   | 3-day, $P = 0.1183$<br>2-day, $P = 0.2202$<br>1-day, $P = 0.3445$                                                  | One-way ANOVA<br>$F(2, 9) = 0.1997$<br>$P = 0.8225$           | 3-day vs. 2-day                           | 0.7716     |

|                                  |                                                                                                                                                                                                                                                                                                   |                                                                                           |                                                               |                                                           |                                                                                                           |
|----------------------------------|---------------------------------------------------------------------------------------------------------------------------------------------------------------------------------------------------------------------------------------------------------------------------------------------------|-------------------------------------------------------------------------------------------|---------------------------------------------------------------|-----------------------------------------------------------|-----------------------------------------------------------------------------------------------------------|
| <b>Supplementary<br/>Fig. 1d</b> | SOC control = 12.89,<br>2.85, 4.52, 6.04, 2.00,<br>7.00, 5.85, 4.41, 11.70,<br>8.26 (9)<br>SOC extinction = 35.53,<br>33.56, 33.91, 17.02,<br>19.11, 14.09, 9.98, 11.91,<br>9.09, 9.89 (15)<br>FOC extinction = 81.33,<br>68.92, 81.00, 77.83,<br>54.00, 67.57, 41.67,<br>47.08, 69.60, 40.67 (4) | SOC control, P = 0.8663<br>SOC extinction, P =<br>0.9357<br>FOC extinction, P =<br>0.8853 | Two-way RM<br>ANOVA<br>F (18, 225) =<br>3.007<br>P < 0.001    | 3-day vs. 1-<br>day                                       | 0.8697                                                                                                    |
|                                  |                                                                                                                                                                                                                                                                                                   |                                                                                           |                                                               | SOC<br>extinction vs.<br>FOC<br>extinction                | 0.0023,<br>0.0394,<br>0.0005,<br>0.0070,<br>0.1341,<br>0.0081,<br>0.0062,<br>0.0224,<br>0.0088,<br>0.2664 |
| <b>Supplementary<br/>Fig. 1e</b> | Control = 50.00 (5)<br>SPC = 49.73 (5)                                                                                                                                                                                                                                                            | Control, P = 0.3065<br>SPC, P = 0.0289                                                    | Two-way RM<br>ANOVA<br>F (9, 72) = 1.033<br>P = 0.4230        | Control vs.<br>SPC                                        | 0.9697                                                                                                    |
| <b>Supplementary<br/>Fig. 1f</b> | Control = 17.71 (5)<br>SPC = 18.56 (5)                                                                                                                                                                                                                                                            | Control, P = 0.4262<br>SPC, P = 0.6146                                                    | Unpaired t-test<br>(Two-tailed)<br>t = 0.1974, df =<br>8      | Control vs.<br>SPC                                        | 0.8485                                                                                                    |
| <b>Supplementary<br/>Fig. 1g</b> | Control = 78.29 (5)<br>SPC = 75.62 (5)                                                                                                                                                                                                                                                            | Control, P = 0.2897<br>SPC, P = 0.4856                                                    | Unpaired t-test<br>(Two-tailed)<br>t = 0.3184, df =<br>8      | Control vs.<br>SPC                                        | 0.7584                                                                                                    |
| <b>Supplementary<br/>Fig. 2c</b> | Median difference =<br>0.1786 (103 neurons)                                                                                                                                                                                                                                                       | Early, P < 0.0001<br>Late, P < 0.0001                                                     | Wilcoxon signed<br>rank test<br>W = 1196                      | Early vs.<br>Late                                         | 0.0490                                                                                                    |
| <b>Supplementary<br/>Fig. 2d</b> | T1 = 61.75 (8)<br>T2 = 169.6 (8)<br>T3 = 115.0 (8)<br>T4 = 221.8 (8)                                                                                                                                                                                                                              | T1, P = 0.0788<br>T2, P = 0.0128<br>T3, P = 0.0388<br>T4, P = 0.0134                      | Friedman test<br>F = 1.650<br>P = 0.6481                      | T1 vs. T2                                                 | >0.9999                                                                                                   |
|                                  |                                                                                                                                                                                                                                                                                                   |                                                                                           |                                                               | T1 vs. T3                                                 | >0.9999                                                                                                   |
|                                  |                                                                                                                                                                                                                                                                                                   |                                                                                           |                                                               | T1 vs. T4                                                 | >0.9999                                                                                                   |
|                                  |                                                                                                                                                                                                                                                                                                   |                                                                                           |                                                               | T2 vs. T3                                                 | >0.9999                                                                                                   |
|                                  |                                                                                                                                                                                                                                                                                                   |                                                                                           |                                                               | T2 vs. T4                                                 | >0.9999                                                                                                   |
|                                  |                                                                                                                                                                                                                                                                                                   |                                                                                           |                                                               | T3 vs. T4                                                 | >0.9999                                                                                                   |
| <b>Supplementary<br/>Fig. 2e</b> | AUC = 107.34 (8)<br>Freezing = 45.49 (8)                                                                                                                                                                                                                                                          | AUC, P = 0.2037<br>Freezing, P = 0.0678                                                   | Simple linear<br>regression<br>F (1, 6) = 8.751<br>P = 0.0253 | Equation<br>Y = 0.2018X<br>+ 25.04                        | r <sup>2</sup> =<br>0.5933                                                                                |
| <b>Supplementary<br/>Fig. 3f</b> | Mean difference = -<br>8.833 (total 8, control<br>and experiment)                                                                                                                                                                                                                                 | Light, P = 0.0765<br>Post light, P = 0.9358                                               | Paired t-test<br>(Two-tailed)<br>t = 3.043, df = 7            | Light vs.<br>Post light                                   | 0.0188                                                                                                    |
| <b>Supplementary<br/>Fig. 3g</b> | Median difference = -<br>0.2432 (155 neurons)                                                                                                                                                                                                                                                     | Light (SOC), P < 0.001<br>Post light (SOC), P <<br>0.001                                  | Wilcoxon signed<br>rank test<br>W = -2670                     | Light (SOC)<br>vs. Post light<br>(SOC)                    | 0.0168                                                                                                    |
|                                  | Median difference = -<br>0.0746 (108 neurons)                                                                                                                                                                                                                                                     | Light (Habituation), P <<br>0.001<br>Post light (Habituation),<br>P < 0.001               | Wilcoxon signed<br>rank test<br>W = -1252                     | Light<br>(Habituation)<br>vs. Post light<br>(Habituation) | 0.0550                                                                                                    |
|                                  | Median difference = -<br>0.9825                                                                                                                                                                                                                                                                   | Light (SOC), P < 0.001<br>Light (Habituation), P <<br>0.001                               | Mann Whitney<br>test<br>U = 4195                              | Light<br>(Habituation)<br>vs. Light<br>(SOC)              | <0.0001                                                                                                   |
|                                  | Median difference = -<br>0.6531                                                                                                                                                                                                                                                                   | Post light (SOC), P <<br>0.001                                                            | Mann Whitney<br>test                                          | Post light<br>(Habituation)                               | <0.0001                                                                                                   |

|                                  |                                                                                     |                                                                          |                                                            |                                    |                                                        |
|----------------------------------|-------------------------------------------------------------------------------------|--------------------------------------------------------------------------|------------------------------------------------------------|------------------------------------|--------------------------------------------------------|
|                                  |                                                                                     | Post light (Habituation),<br>P < 0.001                                   | U = 5601                                                   | vs. Post light<br>(SOC)            |                                                        |
| <b>Supplementary<br/>Fig. 3h</b> | Mean differences = -<br>9.931 (8)                                                   | Light, P = 0.1978<br>Post light, P = 0.3281                              | Paired t-test<br>(Two-tailed)<br>t = 1.245, df = 7         | Light vs.<br>Post light            | 0.2534                                                 |
| <b>Supplementary<br/>Fig. 4g</b> | Baseline = 0.443 (122)<br>CS2 = 0.540 (122)                                         | Baseline, P = 0.0222<br>CS2, P < 0.0001                                  | Pairwise<br>Pearson's<br>correlation<br>P = 0.2681         | Baseline vs.<br>CS2                | P =<br>0.0027<br>Cohen's d<br>= 0.1567                 |
| <b>Supplementary<br/>Fig. 4h</b> | Baseline = 0.421 (122)<br>CS2 = 0.618 (122)                                         | Baseline, P = 0.0046<br>CS2, P = 0.0124                                  | Pairwise<br>Pearson's<br>correlation<br>P = 0.4384         | Baseline vs.<br>CS2                | P =<br>3.937*10 <sup>-7</sup><br>Cohen's d<br>= 0.9288 |
| <b>Supplementary<br/>Fig. 5e</b> | Median differences =<br>0.03921                                                     | Tone, P < 0.0001<br>Light, P < 0.0001                                    | Wilcoxon signed<br>rank test<br>W = 365.0                  | Tone vs.<br>Light                  | 0.3667                                                 |
| <b>Supplementary<br/>Fig. 6a</b> | mCherry = 50.24 (13)<br>hM4Di = 28.03 (8)                                           | mCherry, P = 0.9041<br>hM4Di, P = 0.6037                                 | Unpaired t-test<br>(Two-tailed)<br>t = 3.001, df =<br>19   | mCherry vs.<br>hM4Di               | 0.0073                                                 |
| <b>Supplementary<br/>Fig. 6b</b> | WT control = 0.2114<br>(10)<br>WT experiment = 0.6799<br>(10)<br>hM4Di = 0.3221 (8) | WT control, P = 0.2596<br>WT experiment, P =<br>0.3165<br>hM4Di = 0.6684 | One-way<br>ANOVA<br>F (2, 25) = 17.48<br>P < 0.0001        | hM4Di vs.<br>WT control            | 0.4269                                                 |
|                                  |                                                                                     |                                                                          |                                                            | hM4Di vs.<br>WT<br>experiment      | 0.0011                                                 |
|                                  |                                                                                     |                                                                          |                                                            | WT control<br>vs. WT<br>experiment | <0.0001                                                |
| <b>Supplementary<br/>Fig. 6c</b> | mCherry = 39.54 (13)<br>hM4Di = 19.43 (8)                                           | mCherry, P = 0.8760<br>hM4Di, P = 0.0439                                 | Mann Whitney<br>test<br>U = 22                             | mCherry vs<br>hM4Di                | 0.0302                                                 |
| <b>Supplementary<br/>Fig. 6d</b> | mCherry = 83.21 (8)<br>hM4Di = 85.67 (5)                                            | mCherry, P = 0.0938<br>hM4Di, P = 0.2596                                 | Two-way RM<br>ANOVA<br>F (2, 22) =<br>0.1924<br>P = 0.8264 | mCherry vs<br>hM4Di                | T1,<br>0.9995                                          |
|                                  |                                                                                     |                                                                          |                                                            |                                    | T2,<br>0.8464                                          |
|                                  |                                                                                     |                                                                          |                                                            |                                    | T3,<br>0.9992                                          |
| <b>Supplementary<br/>Fig. 6e</b> | mCherry = 83.21 (8)<br>hM4Di = 85.67 (5)                                            | mCherry, P = 0.0938<br>hM4Di, P = 0.2596                                 | Unpaired t-test<br>t = 0.435, df =<br>11                   | mCherry vs<br>hM4Di                | 0.6718                                                 |

85

## 86 Reference

- 87 1. Franklin, K. and Paxinos G. *et al.* Paxinos and Franklin's the Mouse Brain in Stereotaxic Coordinates;  
88 5<sup>th</sup> edition. *Academic Press*, (2019).
